# Supplementary material for: Exploration of the Gut–Brain Axis through Metabolomics Identifies Serum Propionic Acid Associated with Higher Cognitive Decline in Older Persons
Source: MDPI journal article supplement (doi:10.3390/nu14214688), 2022-11-05
Supplement: s1 [file s1]

## Exploration of the gut-brain axis through metabolomics identifies serum propionic acid associated with higher cognitive decline in older persons

Neuffer J. & al

Supplementary data

**Supplementary table S1.** List of the 206 food-related metabolites quantified in serum by the multi-metabolite metabolomics platform (with the 72 candidate food and gut microbiota-derived metabolites emphasized in bold)

---

### **Endogenous metabolites**

---

glycine

L-alanine

L-valine

L-leucine

L-serine

L-threonine

L-proline

L-arginine

L-glutamate

L-aspartate

L-glutamine

L-asparagine

L-histidine

L-lysine

L-cysteine

L-methionine

**L-phenylalanine**

**L-tyrosine**

**L-tryptophan**

pyroglutamic acid

N6-trimethyl-lysine

**phenyllactic acid**

**p-hydroxyphenyllactic acid**

**phenylacetylglutamine**

**epinephrine**

**p-cresol sulfate**

**p-cresol glucuronide**

**indoxyl sulfate**

5-hydroxytryptophan

**serotonin**

**indole-3-lactic acid**

**indole-3-acetic acid**

**5-hydroxyindole-3-acetic acid**

**indole-3-propionic acid**

**kynurenine**

**kynurenic acid**

**xanthurenic acid**

**anthranilic acid**

**picolinic acid**

oxaloacetic acid

citric acid

**lactic acid**

pyruvic acid

**propionic acid**

**butyric acid**

**valeric acid**

octanoic acid

decanoic acid

lauric acid

myristic acid

pentadecanoic acid

palmitic acid

palmitoleic acid

margaric acid

stearic acid

oleic acid

linoleic acid

linolenic acid

eicosapentaenoic acid

arachidonic acid

docosatetraenoic acid

docosapentaenoic acid

docosahexaenoic acid

D-glucose

ornithine

citrulline

**choline**

**trimethylamine N-oxide**

**betaine**

taurine

urea

creatine

creatinine

guanosine

xanthine

uric acid

allantoin

hypoxanthine

adenine

adenosine

uracil

uridine

**L-carnitine**

Acetyl-L-carnitine

Propionyl-L-carnitine

Butyryl-L-carnitine

Hexanoyl-L-carnitine

Octanoyl-L-carnitine

Decanoyl-L-carnitine

Undecanoyl-L-carnitine

Dodecanoyl-L-carnitine

Myristoyl-L-carnitine

Palmitoyl-L-carnitine

Oleoyl-L-carnitine

Linoleyl-L-carnitine

Desmosterol

7-Ketocholesterol

Cholesterol sulfate

pregnenolone sulfate

dehydroepiandrosterone sulfate

testosterone

estrone 3-sulfate

17 $\beta$ -estradiol 3-sulfate

cortisol

corticosterone

11-deoxycortisol

**Cholic acid**

Glycocholic acid

Taurocholic acid

Chenodeoxycholic acid

Chenodeoxycholic acid 3-glucuronide

Glycochenodeoxycholic acid

Glycochenodeoxycholic acid 3-glucuronide

Taurochenodeoxycholic acid

**Deoxycholic acid**

**Glycodeoxycholic acid**

Glycodeoxycholic acid 3-sulfate

**Taurodeoxycholic acid**

**Glycolitocholic acid 3-sulfate**

**Taurolitocholic acid 3-sulfate**

Retinol

**Thiamine**

**Riboflavin**

**Niacinamide**

**pantothenic acid**

#### **4-Pyridoxic acid**

#### **Biotin**

ascorbic acid

25-hydroxyvitamin D3

$\alpha$ -Tocopherol

linoleoyl-glycerophosphocholine

---

#### **exogenous metabolites**

---

**2-hydroxybenzoic acid**

**3-hydroxybenzoic acid sulfate**

**4-hydroxybenzoic acid sulfate**

**2,6-dihydroxybenzoic acid**

**3,4-dihydroxybenzoic acid**

**dihydroxybenzoic acid glucuronide**

**hippuric acid**

**4-hydroxyhippuric acid**

**3-hydroxyhippuric acid**

**vanillic acid**

**isovanillic acid**

**2-hydroxyphenylacetic acid**

**4-hydroxyphenylacetic acid**

**glucuronide**

**3-hydroxyphenylacetic acid sulfate**

**3,4-dihydroxyphenylacetic acid  
sulfate**

**o-coumaric acid sulfate**

**ferulic acid 4-sulfate**

**3-(3-hydroxyphenyl)propionic acid**

**hydroxyphenylpropionic acid  
sulfate**

**3-(3,5-dihydroxyphenyl)propionic  
acid sulfate**

**dihydrocaffeic acid 3-sulfate**

**dihydroferulic acid**

**dihydroferulic acid 4-sulfate**

**dihydroisoferulic acid 3-sulfate**

**3-(3-hydroxyphenyl)-3-**

**hydroxypropionic acid**

**pyrogallol sulfate 1**

**methylpyrogallol sulfate 1**

**catechol sulfate**

**4-methylcatechol sulfate 1**

**vanillin**

**5-(4-hydroxy(3-4-dihydroxyphenyl)-  
valeric acid sulfate 1**

**3',4'-dihydroxyphenyl- $\gamma$ -  
valerolactone sulfate**

**4'-hydroxy-3'-methoxyphenyl- $\gamma$ -  
valerolactone sulfate**

**naringenin 7-glucuronide**

**naringenin glucuronide**

hesperetin 3'-glucuronide  
hesperetin sulfate  
bergaptol glucuronide  
bergaptol sulfate  
umbelliferone sulfate  
4-methylumbelliferone sulfate  
daidzein 4'-sulfate  
genistein 7-sulfate  
**urolithin A glucuronide**  
**urolithin A sulfate**  
**urolithin B glucuronide**  
**urolithin B sulfate**  
trans-resveratrol 3-sulfate  
cis-resveratrol 3-sulfate  
**dihydroresveratrol sulfate 1**  
**enterolactone**  
**enterolactone sulfate**  
atractyligenin glucuronide  
acesulfame K  
saccharin  
ethyl sulfate  
tartaric acid  
2-furoylglycine  
1-methylxanthine  
3-methylxanthine  
paraxanthine +theophylline  
theobromine  
caffeine  
1-methyluric acid  
1,7-dimethyluric acid  
5-acetamido-6-formylamino-3-methyluracil  
cyclo(L-leucyl-L-prolyl)  
cyclo(L-prolyl-L-valyl)  
**ergothioneine**  
proline betaine  
4-hydroxyproline betaine  
carnosine  
1-methylhistidine  
3-methylhistidine  
arsenobetaine  
N-methylpyridinium  
 $\alpha$ -chaconine

---

**Supplementary table S2.** List of the 72 candidate food and gut microbiota-derived

metabolites measured in serum, with chemical class, endogenous versus exogenous origin and relation to the gut microbiota (derivative versus substrate)

| Class                                       | Metabolite                    | Abbreviated name      | Derivative (D)/<br>Substrate (S) |
|---------------------------------------------|-------------------------------|-----------------------|----------------------------------|
| Amino-acids<br>and<br>derivatives           | Phenylalanine                 | Phenylalanine         | S                                |
|                                             | Tryptophan                    | Tryptophan            | S & D                            |
|                                             | Tyrosine                      | Tyrosine              | S & D                            |
|                                             | Phenyl-lactic acid            | Phenyl-lactic acid    | D                                |
|                                             | p-Hydroxyphenyl-lactic acid   | p-HPLA                | D                                |
|                                             | Phenylacetylglutamine         | Phenylacetylglutamine | D                                |
|                                             | p-Cresol sulfate              | p-cresol-S            | D                                |
|                                             | p-Cresol glucuronide          | p-cresol-G            | D                                |
|                                             | Indole-3-propionic acid       | IPA                   | D                                |
|                                             | Indole-3-acetic acid          | IAA                   | D                                |
|                                             | Indoxyl sulfate               | Indoxyl Sulfate       | D                                |
|                                             | Indole-3-lactic acid          | Indolelactic acid     | D                                |
|                                             | 5-Hydroxyindole-3-acetic acid | 5-HIAA                | D                                |
|                                             | Kynurenine                    | Kynurenine            | D                                |
|                                             | Kynurenic acid                | Kynurenic acid        | D                                |
|                                             | Xanthurenic acid              | Xanthurenic acid      | D                                |
|                                             | Anthranillic acid             | Anthranillic acid     | S                                |
|                                             | Picolinic acid                | Picolinic acid        | D                                |
|                                             | Ergothioneine                 | Ergothioneine         | D                                |
|                                             | Epinephrine                   | Epinephrine           | D                                |
|                                             | Serotonin                     | Serotonin             | D                                |
| Organic acids                               | Lactic acid                   | lactic acid           | D                                |
| TMAO and<br>substrates                      | Trimethylamine N-oxide        | TMAO                  | D                                |
|                                             | Betaine                       | betaine               | S                                |
|                                             | Choline                       | choline               | S                                |
|                                             | L-Carnitine                   | L-carnitine           | S                                |
| Bile acids                                  | Glycodeoxycholic acid         | GDCA                  | D                                |
| B vitamins                                  | Thiamine                      | Thiamine              | D                                |
|                                             | Riboflavin                    | Riboflavin            | S&D                              |
|                                             | Niacinamide                   | Niacinamide           | D                                |
|                                             | Pantothenic acid              | Pantothenic acid      | S&D                              |
|                                             | 4-Pyridoxic acid              | 4-pyridoxic acid      | D                                |
|                                             | Biotin                        | Biotin                | D                                |
| Short chain<br>fatty acids                  | Valeric acid                  | valeric acid          | D                                |
|                                             | Butyric acid                  | butyric acid          | D                                |
|                                             | Propionic acid                | propionic acid        | D                                |
| Phenolic<br>compounds<br>and<br>derivatives | Urolithin A glucuronide       | UroA-G                | D                                |
|                                             | Urolithin A sulfate           | UroA-S                | D                                |
|                                             | Urolithin B glucuronide       | UroB-G                | D                                |
|                                             | Urolithin B sulfate           | UroB-S                | D                                |
|                                             | 2-Hydroxybenzoic acid         | 2-HBA                 | D                                |
|                                             | 3-Hydroxybenzoic acid sulfate | 3-HBA-S               | D                                |

| Class | Metabolite                                                           | Abbreviated name | Derivative (D)/<br>Substrate (S) |
|-------|----------------------------------------------------------------------|------------------|----------------------------------|
|       | 4-Hydroxybenzoic acid sulfate                                        | 4-HBA-S          | D                                |
|       | 2,6-Dihydroxybenzoic acid                                            | 2,6-DHBA         | D                                |
|       | 3,4-Dihydroxybenzoic acid                                            | 3,4-DHBA         | D                                |
|       | Hippuric acid                                                        | HA               | D                                |
|       | 4-Hydroxyhippuric acid                                               | 4-HHA            | D                                |
|       | 3-Hydroxyhippuric acid                                               | 3-HHA            | D                                |
|       | Isovanillic acid                                                     | iVA              | D                                |
|       | 2-Hydroxyphenylacetic acid                                           | 2-HPAA           | D                                |
|       | 4-Hydroxyphenylacetic acid<br>glucuronide                            | 4-HPAA-G         | D                                |
|       | 3-Hydroxyphenylacetic acid<br>sulfate                                | 3-HPAA-S         | D                                |
|       | 3,4-Dihydroxyphenylacetic<br>acid sulfate                            | 3,4-DHPAA-S      | D                                |
|       | Ferulic acid 4-sulfate                                               | FA-4S            | D                                |
|       | 3-(3-Hydroxyphenyl)propionic acid                                    | 3-HPPA           | D                                |
|       | Hydroxyphenylpropionic acid<br>sulfate                               | HPPA-S           | D                                |
|       | 3-(3,5-Dihydroxyphenyl)propionic<br>acid sulfate                     | 3,5-DHPPA-S      | D                                |
|       | Dihydrocaffeic acid 3-sulfate                                        | DHCA-3S          | D                                |
|       | Dihydroferulic acid                                                  | DHFA             | D                                |
|       | Dihydroferulic acid 4-sulfate                                        | DHFA-S           | D                                |
|       | Dihydroisoferulic acid 3-<br>sulfate                                 | DHiFA-S          | D                                |
|       | 3-(3-Hydroxyphenyl)-3-<br>hydroxypropionic acid                      | 3-HPHPA          | D                                |
|       | Pyrogallol sulfate                                                   | PYR-S            | D                                |
|       | Methylpyrogallol sulfate                                             | MePYR-S          | D                                |
|       | Catechol sulfate                                                     | CAT-S            | D                                |
|       | 4-Methylcatechol sulfate                                             | 4-MeCAT-S        | D                                |
|       | Vanillin                                                             | VAN              | D                                |
|       | 3',4'-Dihydroxyphenyl- $\gamma$ -<br>valerolactone sulfate           | 3',4'-DHPV-S     | D                                |
|       | 4'-Hydroxy-3'-<br>methoxyphenyl- $\gamma$ -<br>valerolactone sulfate | MHPV-S           | D                                |
|       | Dihydroresveratrol sulfate                                           | DHRSV-S          | D                                |
|       | Enterolactone sulfate                                                | EL-S             | D                                |
|       | Enterolactone                                                        | EL               | D                                |

**Supplementary Figure S1.** Distribution of plasmatic propionic acid concentration in the pooled sample (n=838)

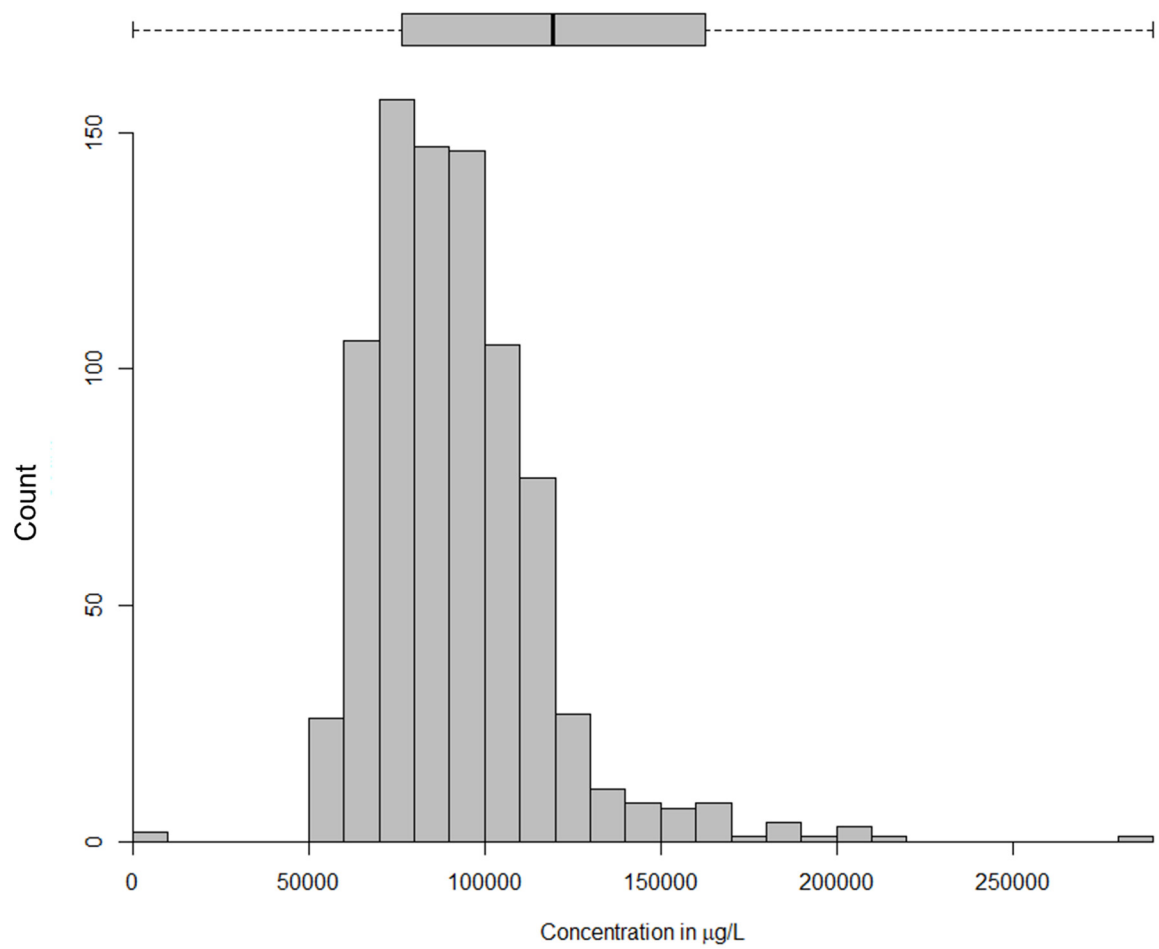



**Supplementary Figure S2.** Directed Acyclic Graph to identify potential confounders and mediators in the relation of propionic acid in serum to cognitive decline

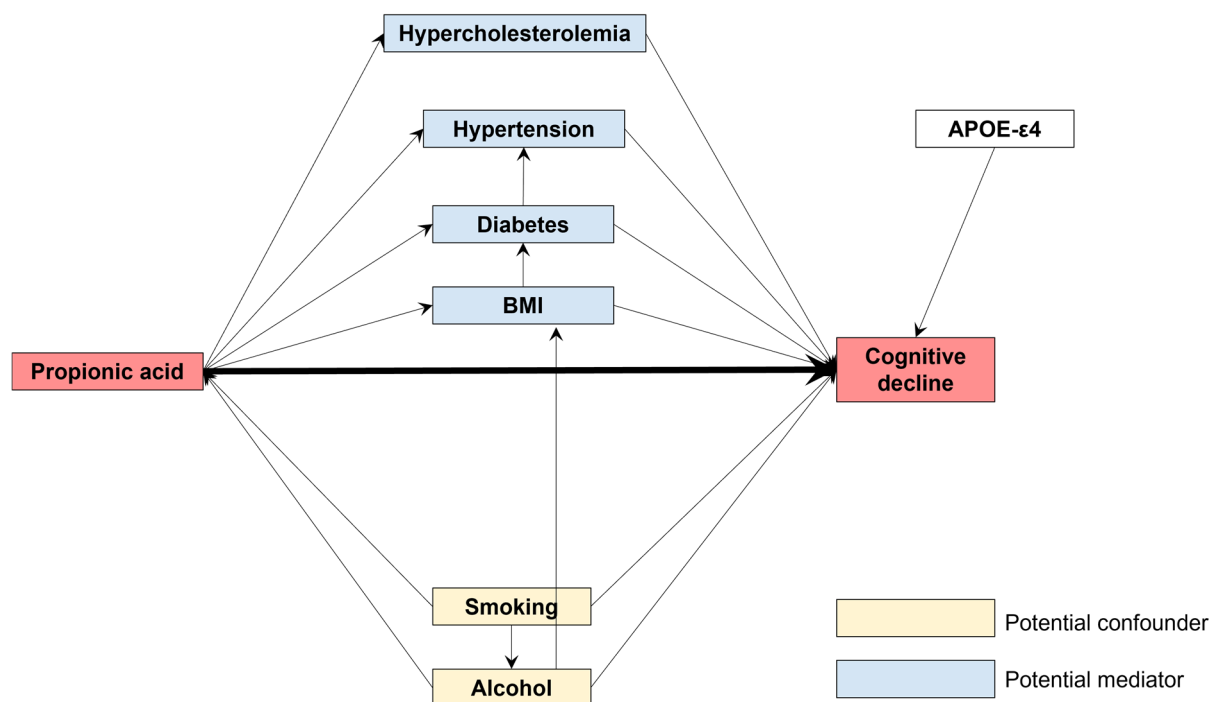

Footnote: A directed acyclic graph (DAG) was implemented using DAGitty software (version 3.0) to identify the factors of adjustment in the model estimating the association between propionic acid in serum and cognitive decline. Covariates and their potential role in the relation of propionic acid to cognitive decline (beyond the matching variables age, sex and education) were selected from the literature.

**Supplementary Figure S3.** Counterfactual mediation analysis for matched data to estimate the mediating effect of hypertension, hypercholesterolemia and diabetes in the relation of propionic acid in serum to the odds of cognitive decline over 12 years in the pooled sample (n=838)

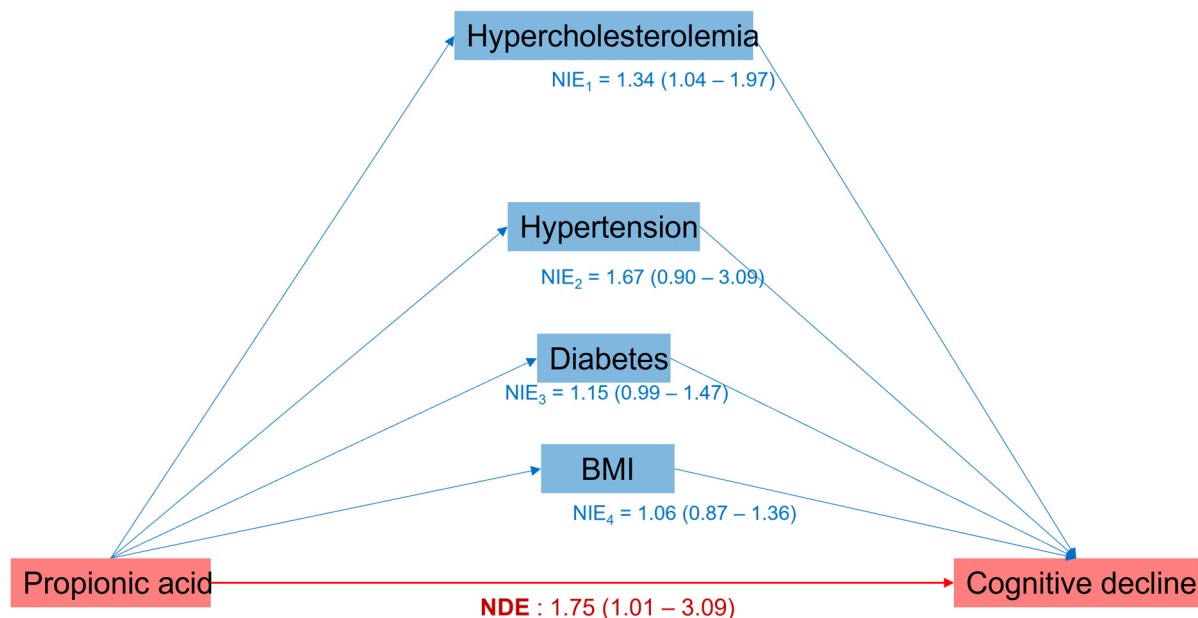

**Footnote:** A counterfactual mediation analysis for matched data[1,2] was run independently for each of the four potential mediators using conditional logistic regression models adjusted for confounders (alcohol consumption and smoking) and other potential mediators (BMI, hypercholesterolemia, hypertension or diabetes). Propionic acid and mediators were modeled as a binary variables (concentration  $\geq 75^{\text{th}}$  vs  $< 25^{\text{th}}$  percentiles for propionic acid;  $\geq 30 \text{ kg/m}^2$  vs  $< 30 \text{ kg/m}^2$  for BMI, yes/no for hypertension, hypercholesterolemia and diabetes).

Note that there is no method available yet, to our knowledge, to assess in a unique analysis multiple mediation through potentially correlated mediators in matched case-control studies; here, we adapted the method by Kim et al[2] to several mediators, modeled non-concomitantly. In counterfactual approaches, two assumptions about unmeasured confounders must hold: (i) There is no mediator – outcome confounder affected by exposure, and (ii) no exposure-mediator interaction. There was no statistically significant interaction between propionic acid (the exposure) and any of the 4 mediators on the odds of cognitive decline. In each model, the total effect of propionic acid on cognitive decline was decomposed into a natural direct effect (NDE, red arrow) and a natural indirect effect (NIE<sub>1</sub>, NIE<sub>2</sub>, NIE<sub>3</sub> and NIE<sub>4</sub>, blue arrows) through the mediator. NDE is interpreted as the effect of propionic acid on cognitive decline when the path between each mediator and cognitive decline is blocked. NIE represents the impact of propionic acid on cognitive decline when the value of the mediator changes.

## **References**

1. VanderWeele, T. J. Mediation Analysis: A Practitioner's Guide. *Annu. Rev. Public Health* **2016**, *37*, 17–32
2. Kim, Y. M. *et al.* Causal mediation analysis in nested case-control studies using conditional logistic regression. *Biom. J.* **2020**, *62*, 1939–1959
